1 **Title:** Premature termination codon readthrough in *Drosophila* varies in a developmental and  
2 tissue-specific manner

3

4 **Authors:** Yanan Chen<sup>1, 2</sup>, Tianhui Sun<sup>2</sup>, Zhuo Bi<sup>1, 2</sup>, Jian-Quan Ni<sup>3</sup>, Jose C. Pastor-Pareja<sup>2, 4\*</sup>  
5 and Babak Javid<sup>1, 5\*</sup>

6

7 **Affiliations:**

8 <sup>1</sup> Center for Global Health and Infectious Disease Research, Collaborative Innovation Center  
9 for the Diagnosis and Treatment of Infectious Diseases, Tsinghua University School of  
10 Medicine, Beijing, China 100084

11 <sup>2</sup> School of Life Sciences, Tsinghua University, Beijing, China 100084

12 <sup>3</sup> Tsinghua University School of Medicine, Beijing, China 100084

13 <sup>4</sup> Tsinghua-Peking Joint Center for Life Sciences, Tsinghua University, Beijing, China 100084

14 <sup>5</sup> Beijing Advanced Innovation Center in Structural Biology

15

16 \* to whom correspondence should be addressed:

17 jose.pastor@biomed.tsinghua.edu.cn (JCPP)

18 bjavid@gmail.com (BJ – lead contact)

19

20 **Running title:** high rates of PTC-readthrough in fly neurons

21

22 **Key words:** stop codon readthrough, premature termination codon, *Drosophila*, mistranslation

23

24 **Abstract**

25 Despite their essential function in terminating translation, readthrough of stop codons occurs  
26 more frequently than previously supposed. However, little is known about the regulation of stop  
27 codon readthrough by anatomical site and over the life cycle of animals. Here, we developed a  
28 set of reporters to measure readthrough in *Drosophila melanogaster*. A focused RNAi screen in  
29 whole animals identified *upf1* as a mediator of readthrough, suggesting that the stop codons in  
30 the reporters were recognized as premature termination codons (PTCs). We found readthrough  
31 rates of PTCs varied significantly throughout the life cycle of flies, being highest in older adult  
32 flies. Furthermore, readthrough rates varied dramatically by tissue and, intriguingly, were  
33 highest in fly brains, specifically neurons and not glia. This was not due to differences in  
34 reporter abundance or nonsense-mediated mRNA decay (NMD) surveillance between these  
35 tissues. Overall, our data reveal temporal and spatial variation of PTC-mediated readthrough in  
36 animals, and suggest that readthrough may be a potential rescue mechanism for PTC-harboring  
37 transcripts when the NMD surveillance pathway is inhibited.

38

39

## 40 **Introduction**

41 Fidelity of protein biosynthesis, including termination of the nascent polypeptide chain, is  
42 critical for all cellular functions. In eukaryotes, translation termination is a highly conserved  
43 process, and ribosomes can terminate protein biosynthesis with remarkable fidelity when  
44 encountering a stop codon<sup>1,2</sup>. Sometimes, however, translation can continue through a stop  
45 codon and terminate at the next in-frame stop codon, a mechanism commonly known as stop  
46 codon readthrough<sup>3</sup>.

47

48 In RNA viruses, readthrough is extensively utilized to append an extension domain to a  
49 proportion of coat proteins<sup>4</sup>. However, readthrough also occurs in the synthesis of eukaryotic  
50 proteins. In yeast, [*PSI*<sup>+</sup>] cells which carry the prion form of eRF3 (Sup35p) show a reduced  
51 efficiency of translation termination and higher rates of stop codon readthrough<sup>3</sup>. The [*PSI*<sup>+</sup>]  
52 strains exhibit phenotypic diversity which is beneficial to adapt to fluctuating environments<sup>5,6</sup>.  
53 In *Drosophila*, the *headcase* (*hdc*) gene encodes two different proteins, one of them produced  
54 by translational readthrough, and the readthrough product is necessary for *Drosophila* tracheal  
55 development<sup>7</sup>. There have also been a number of reports of readthrough in mammals, including  
56 in mouse brains<sup>8-10</sup>.

57

58 Validation of eukaryotic readthrough candidates had been confined to relatively small numbers  
59 until a comparative genomics methodology was used to analyze nucleotide sequences  
60 immediately adjacent to protein-coding regions in 12 *Drosophila* species. By identifying highly  
61 conserved sequences following native stop codons, Kellis and colleagues proposed more than  
62 300 novel readthrough candidates<sup>11</sup>. Using ribosome profiling, Dunn *et al* experimentally  
63 validated a large number of these evolutionarily conserved readthrough candidates, as well as  
64 identifying more than 300 examples of non-conserved stop codon readthrough events in *D.*

65 *melanogaster* embryos and the S2 cell-line<sup>12</sup>. Although there is some debate about whether stop  
66 codon readthrough truly represents a regulatory mechanism<sup>13</sup>, and there are mechanisms to  
67 mitigate canonical readthrough<sup>14</sup>, these data suggest that stop codon readthrough in eukaryotes  
68 is far more pervasive than previously appreciated. We therefore decided to measure readthrough  
69 in flies using a set of novel gain-of-function reporter lines that could sensitively detect  
70 translation through stop codons in animals throughout their life cycle, as well as in specific  
71 tissues. Furthermore, we confirmed that the stop codons in our readthrough reporters are  
72 recognized as premature termination codons (PTCs) in flies. We observed that stop codon  
73 readthrough frequency in two candidate gene reporters varied widely throughout fly  
74 development, and appeared to be highest in *Drosophila* neurons. High frequency readthrough  
75 of PTCs may be an alternative rescue pathway for translation of transcripts with premature  
76 termination codons in flies.

77

## 78 **Results and Discussion**

### 79 **An *in vivo* gain-of-function reporter fly line can sensitively detect translational** 80 **readthrough**

81 We wished to measure stop codon readthrough in flies across developmental stages of their life  
82 cycle. We initially chose to measure readthrough using a candidate gene, *rab6*, which had been  
83 identified as undergoing moderately elevated readthrough rates in a ribosome profiling study of  
84 fly embryos<sup>12</sup>. We decided to use a gain-of-function reporter<sup>15,16</sup>, since this approach would be  
85 able to detect low levels of readthrough. The gene for Nanoluc luciferase – Nluc<sup>-17</sup>, missing its  
86 start codon, was cloned immediately downstream of *rab6* complete with its native stop codon  
87 and 3' UTR, but missing the second, in-frame, stop codon (Fig. 1a). In our reporter, translation  
88 past the native UAG stop codon would result in functional Nanoluc luciferase enzyme, which  
89 could be detected using commercially available reagents (Fig. 1b). We were able to identify by

90 tandem mass spectrometry a peptide derived from Nluc in flies expressing the reporter (Fig. 1c,  
91 d). To further confirm that readthrough was occurring, we raised a polyclonal antibody to a  
92 peptide coded by the 3'UTR of *rab6*, and verified that a protein band of the appropriate size was  
93 identified by Western blot (Fig. 1e). To verify Nluc protein was actually the product of  
94 translation past the stop codon, not alternative initiation of *nluc* translation bypassing the stop  
95 codon, we performed an “in-gel” Nanoluc luciferase assay capable of detecting functional  
96 enzyme on an SDS-PAGE separated whole-cell lysate (see Methods). We could detect  
97 functional Nluc as the major band corresponding to the size of the Rab6-translated-3'UTR-Nluc  
98 gene product, comparable to a control Rab6-Nluc fusion protein where the native TAG stop  
99 codon of *rab6* had been replaced by CAG, corresponding to a glutamine residue (Fig. 1f).  
100 Although some smaller bands were visible, they comprised a minority of the total signal, and  
101 may have represented alternate initiation or breakdown products. Taken together, these data  
102 confirm that Nluc was expressed in reporter flies as a result of stop codon readthrough.

103

#### 104 **The stop codon of reporter flies is recognized as a premature termination codon**

105 We wished to use our reporter system to measure relative readthrough rates in a semi-  
106 quantitative way. To control for differential expression of the reporter, both the UAS-*rab6*-UTR-  
107 STOP-*nluc* reporter and UAS-*gfp* were driven by Gal4 (see Methods and Fig. S1a). Comparison  
108 of the GFP and Nluc ratios would allow for relative quantitation of stop codon readthrough<sup>18,19</sup>.

109

110 To investigate potential cellular mediators of readthrough in our reporter system, we crossed  
111 our reporter fly line with a focused sub-library of UAS-RNAi fly lines from the Harvard  
112 *Drosophila* RNAi Screening Centre (DRSC) Resource<sup>20</sup> at Tsinghua. Knock-down was driven  
113 via an actin-promoter except where knockdown of the target gene via an actin-driver promoter  
114 was lethal, in which case knock-down was driven by *BM-40-SPARC-Gal4* and *Cg-Gal4*. We

115 chose to define “hits” if Nluc/GFP signal was either two-fold decreased or increased compared  
116 with control. We screened a total of 615 candidate genes, and identified 90 potential regulators  
117 of *rab6* readthrough (Fig. S1b). To eliminate *rab6*-specific hits, we rescreened the hits with a  
118 second reporter line encoding a second readthrough candidate *rps20*<sup>12</sup>. Testing knock-down of  
119 these hits with the *rps20* readthrough reporter identified 25 genes, which showed similar  
120 readthrough phenotypes when knocked down in both *rab6* and *rps20* lines (Fig. S1c-f and  
121 Dataset S1). Only one candidate, the nonsense-mediated mRNA decay (NMD) gene *upf1*<sup>21,22</sup>,  
122 showed increased Nluc/GFP in *rab6* and *rps20* reporters when knocked down (Fig. S2a).

123

124 Stop codons can be classified as ‘native’ or ‘premature’, and mechanisms of both termination  
125 and readthrough vary and depend on how the stop codon is recognized by the cellular  
126 machinery<sup>22</sup>. Nonsense-mediated mRNA decay, is an important surveillance mechanism for  
127 monitoring of transcripts encoding PTCs, and prevents their translation by rapidly degrading  
128 such transcripts. Our identification of *upf1* as a potential mediator of readthrough in our screen  
129 suggested that our reporter constructs were recognized as coding premature termination codons  
130 (PTCs). However, systematic investigation of Upf substrates in yeast and mammalian cells  
131 suggest that apparently normal mRNAs without the classical features of PTC-containing  
132 transcripts may also be targeted for degradation<sup>23-25</sup>. Was the native *rab6* transcript a non-  
133 canonical Upf substrate? Knock-down of *upf1* led to increased abundance of reporter mRNA  
134 (Fig. 2a), but the stability of native *rab6* mRNA was not significantly affected by *upf1*  
135 knockdown (Fig. 2b). These data suggested that rather than representing native gene  
136 readthrough, readthrough rates measured in our reporter flies represented variation in PTC  
137 suppression. To further confirm whether our reporters measured PTC readthrough, we knocked  
138 down two other NMD-associated factors, *smg5* and *upf3*<sup>26</sup>. Knockdown of both factors  
139 increased reporter abundance (Fig. 2c, d), as well as Nluc/ GFP measurements (Fig. S2b),

140 verifying that the reporter constructs, but not the native genes are subject to NMD, and that  
141 relative readthrough rates measured using the reporters would represent PTC readthrough.

142

### 143 **PTC readthrough is regulated in a developmental stage-dependent manner**

144 Since the initially-designed reporters were expressed as two constructs, and only one, expressing  
145 Nluc, but not the other expressing GFP was subject to NMD, it was possible that our apparent  
146 readthrough rates may be skewed, and that some of the hits from the RNAi screen represented  
147 interference with NMD and not readthrough *per se*. We therefore constructed a single-fusion  
148 reporter construct, representing *egfp-rab6-TAG-UTR-nluc* (Fig. 3a). Activity from the reporter  
149 was detected only when both Nluc and Gal4 were expressed (Fig. 3b), verifying its specificity  
150 and absence of background signal. The Nluc signal from whole-cell extract was derived almost  
151 entirely from a protein representing the correct molecular weight for the fusion product, which  
152 was strongly supportive that the reporter represented readthrough (Fig. 3c). Furthermore,  
153 immunoprecipitating and blotting against GFP identified two proteins with sizes representing  
154 normally the terminated translation, as well as a minority product (<1%) representing the  
155 extended polypeptide that would result from stop codon readthrough (Fig. 3d). To determine  
156 whether the new reporter was also subject to NMD, and therefore whether readthrough  
157 represented PTC suppression, we raised flies on cycloheximide or DMSO<sup>27</sup>. Cycloheximide  
158 treatment can stabilize mRNA transcripts subject to NMD<sup>28,29</sup>. Consistent with our other  
159 reporters, the new fusion reporter, but not native *rab6* also appeared to be subject to NMD (Fig.  
160 3e-f). Having constructed a reporter that would measure relative PTC readthrough rates, we  
161 wanted to determine whether levels of readthrough in our PTC reporter varied by development  
162 stage (Fig. S3). We measured Nluc/GFP through larval development (Fig. 3g-h) and also when  
163 adults were hatched at day 0, through day 50 of adult life (Fig. 3i). In immature flies,  
164 readthrough increased, peaking at the pupa stage (Fig. 3h). In adult flies, readthrough increased

165 from the newly hatched stage through to day 20, but decreased thereafter, although staying  
166 higher than the newly hatched adult (Fig. 3i), suggesting that increase in readthrough was not  
167 due to aging *per se*. These results were confirmed with a second fusion *egfp-rps20-TAA-UTR-*  
168 *nluc* reporter (Fig. S4).

169

### 170 **Neuronal tissue undergoes higher rates of stop codon readthrough**

171 To test the spatial variation of PTC-mediated readthrough, we constructed a series of reporter  
172 flies expressing the fusion reporters, driven by tissue-specific promoters. There were clear  
173 differences in levels of readthrough by larval tissue, with the highest PTC readthrough in brain  
174 tissue (Fig. 4a). To further confirm whether neuronal or glial cells were responsible for the high  
175 readthrough rates, we compared stop codon (PTC) readthrough in neurons with those in glia, by  
176 expression of the reporters in those tissues specifically. Neurons exhibited higher readthrough  
177 than glial cells (Fig. 4b, S5). Could differences in NMD and hence reporter mRNA stability  
178 explain this observation? In both neurons and glia, the reporter was subject was to NMD, but  
179 to a similar extent (Fig. 4c, d), and *nluc* transcript abundance was similar in both tissues (Fig.  
180 4e), suggesting that neither tissue variation in NMD or transcript abundance were sufficient to  
181 explain the observed differences between glia and neurons. However, measured Nluc activity,  
182 corrected by GFP (Fig. 4b) or *nluc* transcript abundance (Fig. 4f) was higher in neurons than  
183 glia. Finally, we measured Nluc abundance, as well as the size of the Nluc-containing  
184 polypeptide by the Nluc in-gel assay, in reporters expressed in neurons or glia. For similar  
185 loading of either total protein or non-extended reporter (as measured by blotting against Actin  
186 or GFP respectively), there was substantially more Nluc, at a size corresponding to the  
187 readthrough product, in neurons compared with glia (Fig. 4g). These data confirm that PTC-  
188 readthrough in fly neurons occurred at higher rates than in fly glia.

189



## 190 **Discussion**

### 191 **Higher readthrough rates in old flies is not associated with aging**

192 Most studies on errors in gene translation have been on single-celled organisms, such as bacteria  
193 and yeast<sup>18,30-33</sup> and therefore the relationship between translational error and development or  
194 anatomy has received limited attention. Mistranslation increases in response to stress, for  
195 example viral infection or oxidative damage<sup>34</sup>, and therefore it has been proposed that increased  
196 mistranslation over time may result in “error catastrophe” and may be one of the causes of  
197 aging<sup>35-37</sup>. Experimental evidence for this has been limited. Measuring fidelity of translation of  
198 polyU transcripts *in vitro* in brain homogenates from young and old rats, Filion and Laughrea  
199 failed to identify increased error rates with old age<sup>38</sup>. A more recent study found a strong positive  
200 correlation between fidelity of translation of the first and second codon and longevity in  
201 rodents<sup>39</sup>, suggesting that although mistranslation may not increase in old age, getting to old age  
202 may require high fidelity translation. However, of note, in that study, there was no correlation  
203 between stop codon readthrough and longevity<sup>39</sup>. In our study, whilst we found that older adult  
204 flies had higher rates of readthrough than newly hatched adults (Fig. 3i), this increase in  
205 readthrough did not increase further in very old flies (Fig. 3i), suggesting that some other  
206 regulatory factor than ‘old age’ may be responsible for the observation.

207

### 208 **Neurons are responsible for higher rate of PTC readthrough in CNS**

209 Studies of tissue-specific translational regulation are still in their infancy<sup>40</sup>. A recent study  
210 measured the translome by ribosome profiling of fly muscle through tissue-specific expression  
211 of tagged ribosomes<sup>41</sup>. Mutations in Rpl38 resulted in profound patterning defects due to tissue-  
212 specific expression of Rpl38 and its role in translation of Homeobox mRNAs<sup>42</sup>. CNS-specific  
213 expression of a mutated tRNA resulted in neurodegeneration in mice<sup>43</sup>, again verifying that  
214 components and regulation of the translation apparatus can be expressed in a tissue-specific

215 manner. A recent study observed high rates of native stop codon readthrough in mouse brains,  
216 although differences in readthrough rates between neurons and glia were not apparent<sup>10</sup>. Our  
217 study suggests, in the context of premature stop codon readthrough, there may be substantial  
218 tissue-specific differences in mRNA translation. For both of our reporter gene constructs, there  
219 was increased readthrough specifically in neural tissue (Fig. 4). Further mechanistic studies are  
220 needed to explain the high neuronal readthrough in *Drosophila*.

221

### 222 **Readthrough may represent an alternative mechanism of PTC transcript rescue**

223 Readthrough of the stop codon in our reporters mechanistically represented readthrough of a  
224 PTC (Fig. 2) and as such we cannot determine whether canonical readthrough rates also vary  
225 by developmental stage and anatomical site. In mammals, a stop codon is usually labelled as  
226 premature if it is located more than 50 nucleotides upstream of the last exon-exon junction<sup>21,44</sup>.  
227 However, in *Drosophila*, as well as yeast, the definition of a PTC occurs independently of exon-  
228 exon junctions<sup>45</sup>, and may include other elements for classification, such as “faux” 3’UTRs<sup>46</sup>.  
229 Long 3’ UTRs are permissive for targeting of non-PTC-containing transcripts as substrates of  
230 Upf1 and NMD<sup>47-49</sup>. It is therefore likely that by incorporating the *nluc* gene in the extended  
231 3’UTRs of our reporter constructs, despite conserving all other elements of the stop codon  
232 context, the ‘native’ stop codons of *rab6* and *rps20* were re-classified as PTCs by the *Drosophila*  
233 cellular machinery.

234

235 Despite their potentially disastrous consequences and association with pathology<sup>50</sup>, premature  
236 termination codon-containing transcripts are surprisingly common. Alternative splicing of  
237 mRNA can result in a high frequency of PTC-containing transcripts<sup>51</sup>. And one study estimated  
238 that the typical human individual codes for approximately 100 nonsense- (PTC-containing) gene  
239 variants, of which 20 would be homozygous<sup>52</sup>. Since translation of proteins, abnormally

240 truncated due to the presence of a premature termination codon could result in protein  
241 misfolding, all eukaryotic cells have evolved nonsense-mediated mRNA degradation as a  
242 quality control mechanism to target PTC-containing transcripts for destruction<sup>22,44</sup>. However,  
243 NMD is not 100% efficient, a significant proportion of PTC-containing transcripts escape  
244 NMD<sup>53</sup>. Remarkably, a recent comparison of homozygous PTC-containing genes in humans  
245 with their homozygous “wild-type” counterparts showed that mRNA and protein abundance  
246 were similar in the two groups, suggesting that escape of PTC-containing transcripts from  
247 NMD-mediated degradation may be the norm rather than the exception<sup>54</sup>.

248

249 The Upf-mediated NMD pathway has regulatory functions beyond surveillance of PTC-  
250 containing mRNA and may itself be repressed in a developmental manner<sup>22,55</sup>. Bioinformatic  
251 predictions have suggested that neural tissue may be particularly susceptible to mistranslation-  
252 misfolded protein-induced damage<sup>56,57</sup>. It was therefore surprising that a brain-specific  
253 microRNA, miR-128, actively repressed NMD<sup>58</sup>, and that this downregulation of NMD  
254 represented a switch that triggered neuronal development<sup>59</sup>. Potential mechanisms for rescue  
255 pathways for nonsense-containing transcripts that do not rely on NMD, include RNA editing<sup>60</sup>,  
256 alternative splicing, truncated proteins bypassing the stop codon, and readthrough of the stop  
257 codon<sup>54</sup>. Our data supports a model in which neuronal cells may still be protected from the  
258 potentially deleterious effects of translating PTC-containing transcripts, despite downregulation  
259 of NMD<sup>61</sup> via enhanced readthrough of PTC-containing mRNAs.

260

## 261 **Materials and Methods**

### 262 **Fly Genetics**

263 Standard fly husbandry techniques and genetic methodologies were used to assess transgenes in  
264 the progeny of crosses, construct intermediate fly lines and obtain flies of the required genotypes

265 for each experiment<sup>62</sup>. The Gal4-UAS binary expression system was used to drive transgene  
 266 expression with temporal and spatial control<sup>63</sup>. Flies were cultured at 25°C, and anesthetized by  
 267 CO<sub>2</sub> prior to use in experiments. Fly strains used in this study are listed in Table S1. Intermediate  
 268 strains were constructed using these strains.  
 269 Table S1. Fly strains used in this study.

| Fly strains                                                  | SOURCE                                           | IDENTIFIER              |
|--------------------------------------------------------------|--------------------------------------------------|-------------------------|
| <i>D. melanogaster</i> : <i>w</i> <sup>1118</sup>            | Bloomington<br><i>Drosophila</i> stock<br>center | RRID: BDSC_3605         |
| <i>D. melanogaster</i> : <i>UAS-RpS20-TAA-Nluc (II)</i>      | This study                                       | N/A                     |
| <i>D. melanogaster</i> : <i>UAS-Rab6-TAG-Nluc (III)</i>      | This study                                       | N/A                     |
| <i>D. melanogaster</i> : <i>UAS-Rab6-CAG-Nluc (III)</i>      | This study                                       | N/A                     |
| <i>D. melanogaster</i> : <i>UAS-eGFP-Rab6-TAG-Nluc (III)</i> | This study                                       | N/A                     |
| <i>D. melanogaster</i> : <i>UAS-eGFP-RpS20-TAA-Nluc (II)</i> | This study                                       | N/A                     |
| <i>D. melanogaster</i> : <i>act-FO-Gal4 / TM6B</i>           | Bloomington<br><i>Drosophila</i> stock<br>center | RRID: BDSC_3954         |
| <i>D. melanogaster</i> : <i>actin-Gal4 / TM6B</i>            | Gift from Jose                                   | N/A                     |
| <i>D. melanogaster</i> : <i>Nrv2-Gal4</i>                    | TsingHua Fly Center                              | RRID:<br>THFC_TB00131   |
| <i>D. melanogaster</i> : <i>elav-Gal4</i>                    | Gift from Yi Zhong                               | N/A                     |
| <i>D. melanogaster</i> : <i>repo-Gal4 / TM6B</i>             | Gift from Yi Zhong                               | N/A                     |
| <i>D. melanogaster</i> : <i>crq-Gal4</i>                     | Bloomington<br><i>Drosophila</i> stock<br>center | RRID: BDSC_25041        |
| <i>D. melanogaster</i> : <i>rn-Gal4 / TM6B</i>               | Bloomington<br><i>Drosophila</i> stock<br>center | RRID: BDSC_7405         |
| <i>D. melanogaster</i> : <i>BM-40-SPARC-Gal4 / TM6B</i>      | Gift from Hugo Bellen                            | N/A                     |
| <i>D. melanogaster</i> : <i>Cg-Gal4</i>                      | Bloomington<br><i>Drosophila</i> stock<br>center | RRID: BDSC_7011         |
| <i>D. melanogaster</i> : <i>He-Gal4</i>                      | Bloomington<br><i>Drosophila</i> stock<br>center | RRID: BDSC_8699         |
| <i>D. melanogaster</i> : <i>UAS-Upf1.RNAi</i>                | TsingHua Fly Center                              | RRID:<br>THFC_TH02846.N |
| <i>D. melanogaster</i> : <i>UAS-Upf1.RNAi</i>                | Bloomington<br><i>Drosophila</i> stock<br>center | RRID: BDSC_43144        |
| <i>D. melanogaster</i> : <i>UAS-Upf3.RNAi</i>                | Bloomington<br><i>Drosophila</i> stock<br>center | RRID: BDSC_58181        |
| <i>D. melanogaster</i> : <i>UAS-Smg5.RNAi</i>                | Bloomington<br><i>Drosophila</i> stock<br>center | RRID: BDSC_62261        |

270

271 **Generation of Nluc-tagged readthrough reporter transgenic lines**

12

272 To obtain *UAS-RpS20-TAA-Nluc*, *UAS-Rab6-TAG-Nluc* and *UAS-Rab6-CAG-Nluc* lines, the  
273 relevant *rps20-TAA-nluc*, *rab6-TAG-nluc* and *rab6-CAG-nluc* were separately cloned into  
274 vector pVALIUM10-roe using Gateway recombination. RNA extracted from S2 cells (a kind  
275 gift from Dr. Gong Cheng) was used to synthesize cDNA (Bio-Rad, cat#1708890). Coding  
276 sequences of *rps20*, *rab6* and their following extension 3'UTR<sup>12</sup> were PCR-amplified from  
277 cDNA template with primers adding *attB* site at the 5' termini of the ORF. In order to increase  
278 the expression of the transgenes in *Drosophila*, a 5'UTR element *Syn21*<sup>64</sup> and the Kozak  
279 sequence CAAAATG (the start codon underlined)<sup>65</sup> were added to the coding sequence. *nluc*  
280 was codon optimized by GENEWIZ (Nanjing), and both start codon and stop codon were  
281 removed, and this *nluc* gene was inserted before the second in-frame stop codon of the extension  
282 3'UTR to acquire a fusion protein. Simultaneously, *attB* site was added to the 3' termini of the  
283 modified fusion protein for subsequent Gateway cloning. Additionally, *rab6-CAG-nluc* was  
284 constructed by site directed mutagenesis using *rab6-TAG-nluc* as template. To construct *UAS-*  
285 *eGFP-Rab6-TAG-Nluc* and *UAS-eGFP-RpS20-TAA-Nluc*, *egfp*, missing its stop codon, was  
286 PCR-amplified and fused with *rab6-TAG-nluc* and *rps20-TAA-nluc*, respectively by overlap  
287 PCR.  
288 The PCR products were purified by gel extraction (cwbiotech, cat#CW2302M) and recombined  
289 into vector pDONR221 (Life Technologies, cat#12536017) using Gateway BP Clonase (Life  
290 Technologies, cat#11789020). Then the entry clones were recombined with destination vector  
291 pVALIUM10-roe using Gateway LR clonase (Life Technologies, cat#12538120). The final  
292 plasmids *UAS-RpS20-TAA-Nluc*, *UAS-Rab6-TAG-Nluc*, *UAS-eGFP-Rab6-TAG-Nluc*, *UAS-*  
293 *eGFP-RpS20-TAA-Nluc* and *UAS-Rab6-CAG* were sent to Tsinghua Fly Center to obtain  
294 transgenic fly lines<sup>20</sup> by site-directed insertion. To overexpress protein on the second  
295 chromosome, entry clone was integrated into *attP40* loci, while the overexpressed protein on

296 the third chromosome was obtained by integrating into attP2 loci<sup>66</sup>. All the primers used in  
 297 transgenic fly lines construction are listed in Table S2.  
 298 Table S2. Primers used in transgenic fly lines construction.

| Primers for transgenic fly lines construction                                                                         | SOURCE     | IDENTIFIER |
|-----------------------------------------------------------------------------------------------------------------------|------------|------------|
| <i>att-rps20-TAA-nluc-F</i> :<br>ggggACAAGTTTGTACAAAAAAGCAGGCTaacttaaaaa<br>aaaaatcaaacAAaATGGCTGCTGCACCCAAGGAT       | Ruibiotech | N/A        |
| <i>att-rps20-TAA-nluc-R</i> :<br>ggggACCACTTTGTACAAGAAAGCTGGGTTTAGGCCA<br>GAATGCGCTCGCA                               | Ruibiotech | N/A        |
| <i>rps20-TAA-nluc-F</i> :<br>CACCTCGAAAAGTTTGGCGTGCGTGTTCCACCCTGG<br>AGGATTTTCG                                       | Ruibiotech | N/A        |
| <i>rps20-TAA-nluc-R</i> :<br>CGAAATCCTCCAGGGTGAACACGCACGCCAAACTT<br>TTCGAGGTG                                         | Ruibiotech | N/A        |
| <i>rab6-TAG-nluc-F</i> :<br>TTACGTTTAAGTTTATTTATAAAGGTGTTCCACCCTGG<br>AGGATTTTCGTG                                    | Ruibiotech | N/A        |
| <i>rab6-TAG-nluc-R</i> :<br>CACGAAATCCTCCAGGGTGAACACCTTTATAAATAA<br>ACTTAAACGTAA                                      | Ruibiotech | N/A        |
| <i>att-rab6-TAG-nluc-F</i> :<br>ggggACAAGTTTGTACAAAAAAGCAGGCTaacttaaaaa<br>aaaaatcaaacAAaATGTCATCCGGAGATTTTGGC        | Ruibiotech | N/A        |
| <i>att-rab6-CAG-nluc-F</i> :<br>GAGGGCGGCTGCGCCTGCC <b>AGA</b> ACCGGTTGAGCC<br>GACGATCC                               | Ruibiotech | N/A        |
| <i>att-rab6-CAG-nluc-R</i> :<br>GGATCGTCGGCTCAACCGGTT <b>CT</b> GGCAGGCGCAGC<br>CGCCCTC                               | Ruibiotech | N/A        |
| <i>att-egfp-rab6-TAG-nluc-F</i> :<br>ggggACAAGTTTGTACAAAAAAGCAGGCTaacttaaaaa<br>aaaaatcaaacAAaATGG<br>TGAGCAAGGGCGAGG | Ruibiotech | N/A        |
| <i>egfp-rab6-F</i> :<br>GGCATGGACGAGCTGTACAAGTCATCCGGAGATTT<br>TGGCAAT                                                | Ruibiotech | N/A        |
| <i>egfp-rab6-R</i> :<br>ATTGCCAAAATCTCCGGATGACTTGTACAGCTCGTC<br>CATGCC                                                | Ruibiotech | N/A        |
| <i>egfp-rps20-F</i> :<br>ATGGACGAGCTGTACAAGGCTGCTGCACCCAAGGA<br>T                                                     | Ruibiotech | N/A        |
| <i>egfp-rps20-R</i> :<br>ATCCTTGGGTGCAGCAGCCTTGTACAGCTCGTCCAT                                                         | Ruibiotech | N/A        |

299

### 300 Luciferase-GFP assays

301 Luciferase was measured using the NanoGlo Luciferase Assay Kit (Promega, cat#N1120).  
302 Euthanized flies were collected in 200  $\mu$ l of NB buffer (150 mM NaCl, 50 mM Tris-HCl pH 7.5,  
303 2 mM EDTA, 0.1% NP-40) with addition of protease inhibitor cocktail (Biotool, cat#B14003),  
304 and homogenized with a 96-well plate multiple homogenizer (Burkard Scientific, BAMH-96).  
305 Homogenized samples were centrifuged at 20,000 rcf (4 °C) to pellet the larval remains. For  
306 measuring readthrough level (Nluc/GFP), 30  $\mu$ l of each sample supernatant was transferred to a  
307 white-walled 96-well plate (Costar, cat#3922), an equal volume of Promega Luciferase Reagent  
308 was added to each well and incubated in the dark for 5 min. Another 30  $\mu$ l of each sample  
309 supernatant was correspondingly transferred to a black-walled 96-well plate (Corning,  
310 cat#3925), and an equal volume of NB buffer was added to each well. Luminescence and  
311 fluorescence signal were measured by Fluoroskan Ascent FL (Thermo Scientific).

312

### 313 **Immunoprecipitation of Nluc**

314 For western blot (Fig 1E), Nanoluciferase was immunoprecipitated by addition of 12  $\mu$ g of  
315 rabbit polyclonal anti-Nluc IgG (a generous gift from Lance Encell, Promega) or normal rabbit  
316 IgG as a negative control (Cell Signaling Technology, cat#2729) respectively, to concentrated  
317 fly lysates, and incubated overnight at 4 °C to form the immune complex. The immune complex  
318 was captured by Protein A/G Plus Agarose (Pierce, cat#26146) and eluted by heating the resin  
319 with SDS sample buffer.

320

321 For mass spectrometry (Fig 1d), readthrough product of *rab6* was enriched by a Pierce Direct  
322 IP Kit (Pierce, cat#26148). For each enrichment, 10  $\mu$ g of rabbit polyclonal anti-Nluc IgG  
323 (Promega) was coupled to AminoLink Plus Coupling Resin, and concentrated cell lysate was  
324 incubated with the resin overnight at 4 °C to form the immune complex. The enriched  
325 readthrough product was eluted by a neutral pH elution buffer (Thermo Scientific, cat#21027).



326

### 327 **Immunoprecipitation of eGFP-tagged readthrough reporter**

328 For western blot (Fig 3d), eGFP-tagged readthrough reporter was immunoprecipitated by  
329 addition of 10 µg of mouse monoclonal anti-GFP IgG (Roche, cat#11814460001) or normal  
330 mouse IgG as a negative control (Proteintech, cat#66360-3-Ig) respectively, to concentrated fly  
331 lysates, and incubated overnight at 4 °C to form the immune complex. The immune complex  
332 was captured by Protein A/G Plus Agarose (Pierce, cat#26146) and eluted by heating the resin  
333 with SDS sample buffer.

334

### 335 **NanoLuc In-Gel Detection Assay**

336 The protocol from the Promega technical manual ([https://www.promega.com/-](https://www.promega.com/-/media/files/resources/protocols/technical-manuals/500/nano-glo-in-gel-detection-system-technical-manual.pdf?la=en)  
337 [/media/files/resources/protocols/technical-manuals/500/nano-glo-in-gel-detection-system-technical-](https://www.promega.com/-/media/files/resources/protocols/technical-manuals/500/nano-glo-in-gel-detection-system-technical-manual.pdf?la=en)  
338 [manual.pdf?la=en](https://www.promega.com/-/media/files/resources/protocols/technical-manuals/500/nano-glo-in-gel-detection-system-technical-manual.pdf?la=en)) was followed. Briefly, cell lysates were resolved on 15% SDS-PAGE. The  
339 gel was extracted from its casing and transferred to an appropriate tray. SDS was stripped from  
340 the gel by washing three times with 25% isopropanol in water (20 min each). NanoLuc was re-  
341 natured with three water washes (20 min each). The gel was developed with Furimazine  
342 (Promega, cat#N1120) / TBST (50 mM Tris-HCl pH 7.6, 150 mM NaCl, 0.05% Tween 20, 25  
343 µM Furimazine). The gel image was captured on a white reflective background by Chemidoc  
344 XRS+ (Bio-Rad).

345

### 346 **Western blot**

347 Western blot was performed using standard methods. Rabbit polyclonal antibody to *Drosophila*  
348 Rab6 3'UTR was acquired by immunizing the New Zealand rabbit with peptide  
349 NRLSRRSNHPLPLFC by GenScript company (Nanjing). Readthrough product of *rab6* (Figure  
350 1e) was detected using rabbit anti-Rab6 3'UTR antibody (2 µg/ml, GenScript) and revealed with



351 Clean-Blot IP Detection Reagent (Thermo Scientific, cat#21230) and ECL Western Blotting  
352 Substrate (Pierce, cat#32106). For eGFP-tagged reporter Western blots (Figure 3d), elution was  
353 detected using 1:2500 dilution of monoclonal rat anti-GFP antibody (chromotek, RRID:  
354 AB\_10773374), followed by a 1:5000 dilution of goat anti-rat IgG-HRP secondary antibody  
355 (easybio, cat#BE0109). Expression of reporter from input was detected by mouse anti-GFP IgG  
356 (Roche, cat#11814460001), followed by a 1:5000 dilution of goat anti-mouse IgG-HRP  
357 secondary antibody (cwbiotech, cat#CW0102). Loading control of neural cells (Figure 4g) was  
358 using 1:2000 dilution of anti-insect beta Actin mouse antibody (cmctag, cat#AT0008), followed  
359 by a 1:5000 dilution of goat anti-mouse IgG-HRP secondary antibody, or 1:2500 dilution of  
360 monoclonal rat anti-GFP antibody as mentioned before.

361

### 362 **Mass Spectrometry**

363 Readthrough product of *rab6* was enriched by a developed IP method. After electrophoresis,  
364 SDS PAGE was stained by Imperial Protein Stain (Thermo Scientific, cat#24615), and the gel  
365 between 43 kDa to 55 kDa were cut, digested with trypsin, analyzed by Tsinghua Protein  
366 Chemistry Facility.

367

### 368 **Candidate forward genetic screen**

369 Readthrough reporter fly line *Actin>Rab6-TAG-Nluc* or *Actin>RpS20-TAA-Nluc* was crossed  
370 with a set of *UAS-RNAi* fly lines (Tsinghua Fly Center) to knockdown target genes. Reporter  
371 fly line was crossed with *w<sup>1118</sup>*, and readthrough level (Nluc/ GFP) of progeny was as control.  
372 *BM-40-SPARC>RpS20-TAA-Nluc* and *Cg>Rab6-TAG-Nluc* reporter fly lines were utilized  
373 when knockdown target genes by *actin>Gal4* resulted in growth deficiency. For each  
374 knockdown genotype, 8-12 wandering L3 larvae were collected to measure readthrough level.

375 Readthrough level of control was normalized to 1, and for each knockdown genotype, relative  
376 readthrough fold to control was calculated.

377

### 378 **Developmental stage assay**

379 Parent transgenic reporter line *y v sc; UAS-RpS20-TAA-Nluc* (II) or *y v sc; UAS-Rab6-TAG-*  
380 *Nluc* (III) and an actin driven Gal4 line *w; Sp / CyO; act-FO-Gal4 UAS-GFP / TM6B* was  
381 crossed to express the readthrough reporter ubiquitously in the whole body of progeny. To  
382 eliminate the effect by variation in NMD efficiency, reporter line *y v sc; UAS-eGFP-RpS20-*  
383 *TAA-Nluc* (II) or *y v sc; UAS-eGFP-Rab6-TAG-Nluc* (III) was crossed with *y w; Adv / CyO;*  
384 *actin-Gal4 / TM6B*. After 6 hours of crossing, parent flies were removed to ensure the majority  
385 of the progenies were in the same developmental stage. Cell lysates were flash frozen by liquid  
386 nitrogen and stored at -80°C until all the samples of different developmental stages had been  
387 collected. Readthrough value was measured in whole cell lysate as above.

388

389 For embryo collection, standard apple juice agar plates were supplemented with fresh baker  
390 yeast paste, and collection cages were placed on the plates. Parent flies lay eggs on the plates  
391 for 4 hours. 0-4 hr embryos were collected from the agar plate using a small paintbrush.

392

393 For aged flies collection, newly hatched male and female flies were sorted into independent  
394 groups and cultured them in standard environmental conditions with a 12:12 hr light dark cycle.  
395 During the experimental period, flies were transferred to new vials containing fresh food every  
396 2-3 days<sup>67</sup>. After 40 days of adult life, flies started to die and living flies would be transferred  
397 to fresh food every day to avoid the flies sticking to the food in the old vial.

398

### 399 **Protein extraction from *Drosophila* embryos**

400 Collected embryos were washed gently in a collection basket (Corning, cat#352350). The base  
401 of the basket was dried by a paper tissue, and the basket was transferred to a container with 50%  
402 commercial bleach solution. Incubated for 5 min with gentle, periodic stirring to remove the  
403 chorionic membrane of the embryos. The dechorionated embryos became hydrophobic and  
404 floated on the surface of the bleach solution. Transferred the basket to a new container with  
405 deionized water, washed for 2 min and repeated twice. After wash, about 30 embryos of each  
406 independent sample were transferred to a 1.5 ml eppendorf tube containing 200  $\mu$ l of ice-cold  
407 NB lysis buffer (protease inhibitor cocktail was added) and homogenized by a cordless motor  
408 (Kimble, cat#749540-0000). Homogenized samples were centrifuged at 20,000 rcf (4°C) to  
409 pellet the larval remains, and supernatant avoiding the upper lipid layer was transferred to a new  
410 1.5 ml eppendorf tube.

411

#### 412 **Protein extraction from different *Drosophila* organs or tissues**

413 Expression of readthrough reporter in wing disc was driven by *rn-Gal4*, gut by *crq-Gal4*,  
414 salivary gland by *He-Gal4*, fat body by *Cg-Gl4*, neuron by *elav-Gal4*, glial cells by *repo-Gal4*  
415 and *Nrv2-Gal4*. Different larval organs or tissues were dissected and collected in 100  $\mu$ l of NB  
416 lysis buffer with addition of protease inhibitor cocktail, homogenized by a cordless motor.  
417 Homogenized samples were centrifuged at 20,000 rcf (4 °C) to pellet the larval remains, and  
418 supernatant avoiding the upper lipid layer was transferred to a new 1.5 ml eppendorf tube. The  
419 final cleared cell lysates were flash frozen by liquid nitrogen and stored at -80 °C until all the  
420 samples of different *Drosophila* tissues or organs had been collected.

421

#### 422 **Antibiotics treatment**

423 L3 larvae were transferred to standard fly food containing 500 µg/ml cycloheximide  
424 (MedChemExpress, cat#HY-12320)<sup>27</sup> or DMSO for 24h. Afterwards, total RNA were extracted  
425 for real-time RT-PCR.

426

#### 427 **Real-time quantitative RT-PCR**

428 Approximate 10-20 wandering L3 larvae were collected and RNA was extracted by TransZol  
429 Up (TransGen Biotech, cat#ET111-01). DNase I (TransGen Biotech, cat#GD201-01) was used  
430 to digest genomic DNA. cDNA was synthesized with iScript Reverse Transcription kit (Bio-  
431 Rad, cat#1708890) and iTaq<sup>TM</sup> Universal SYBR Green Supermix (Bio-Rad, cat#1725120) was  
432 used for quantitative PCR. Analysis was performed in a CFX96<sup>TM</sup> Real-Time PCR Detection  
433 System (Bio-Rad). *rp49* was used as a reference gene<sup>68,69</sup>. All PCR reactions were performed in  
434 biological triplicate. Primers used were:

435 *rp49*-For: 5'-GGCCCAAGATCGTGAAGAAG-3';

436 *rp49*-Rev: 5'-ATTTGTGCGACAGCTTAGCATATC-3';

437 *upf1*-For: 5'-ACTTCCGGTTCGCACATCAT-3';

438 *upf1*-Rev: 5'-CTTCCACTGTTCTGGTCCC-3';

439 *upf3*-For: 5'-ATGCTCCCTTCCAGTGCTTC-3';

440 *upf3*-Rev: 5'-CCGCTTGATGAACTCCTGGT-3';

441 *smg5*-For: 5'-GCTTTTTGACTGGCTGCGAA-3';

442 *smg5*-Rev: 5'-ACCAGAGAATCACGCACGTT-3';

443 *nluc*-For: 5'-GATCATCCCCTACGAGGGCT-3';

444 *nluc*-Rev: 5'-GTCGATCATGTTGGGGGTCA-3';

445 *rab6*-3'UTR-For: 5'-ATCCAACCATCCTCTCCCCC-3';

446 *rab6*-3'UTR-Rev: 5'-GCAGATCCGGCCAGTACATA-3';

447 *rps20*-3'UTR-For: 5'-ATCATCGACTTGCACTCGCC-3';

448 *rps20*-3'UTR-Rev: 5'- GCACGCCAAACTTTTCGAGG-3'.

449

#### 450 **Quantitation and Statistical Analysis**

451 Most of experiments were performed at least three times on separate days (that is, independent  
452 experiments). Statistical analysis and graphic representation were performed with Graphpad  
453 Prism software. Two-tailed non-parametric Mann-Whitney tests were used in Fig S2A (data did  
454 not pass normality tests), otherwise means between two sample sets were compared by unpaired,  
455 two-directional Student's *t*-tests in the rest of comparisons. \* $P < 0.05$ , \*\* $P < 0.01$ , \*\*\* $P < 0.001$ ,  
456 \*\*\*\* $P < 0.0001$  were considered statistically significant results.

457

#### 458 **Acknowledgements**

459 We thank Dr. Yi Zhong (*elav-Gal4* and *repo-Gal4*) for kindly sharing fly strains; Lance Encell,  
460 Paul Otto and Thomas Machleidt from Promega for generously providing the anti-Nluc antibody  
461 and the protocol for the NanoLuc luciferase In-Gel Detection Assay; and the Tsinghua Fly  
462 Center for constructing transgenic *in vivo* readthrough reporter fly lines.

463

#### 464 **Funding**

465 This work was supported in part by start-up funds from Tsinghua University to BJ; and a grant  
466 from the National Science Foundation of China [31771600] to JCPP. BJ is an Investigator of  
467 the Wellcome Trust [207487/B/17/Z]. The funders had no role in study design, data collection  
468 and analysis, decision to publish, or preparation of the manuscript.

469

#### 470 **Author Contributions**

471 BJ conceived the project. YNC and BJ designed research. YNC performed the vast majority of  
472 experiments with assistance from THS and ZB. JQN provided the platform for generation of fly

473 lines. JCPP and BJ supervised research. YNC and BJ wrote the manuscript with input from

474 JCPP and other authors.

475

476

## 477 References

- 478 1 Dever, T. E. & Green, R. The elongation, termination, and recycling phases of translation in  
479 eukaryotes. *Cold Spring Harb Perspect Biol* **4**, a013706, doi:10.1101/cshperspect.a013706  
480 (2012).
- 481 2 Brown, A., Shao, S., Murray, J., Hegde, R. S. & Ramakrishnan, V. Structural basis for stop  
482 codon recognition in eukaryotes. *Nature* **524**, 493-496, doi:10.1038/nature14896 (2015).
- 483 3 von der Haar, T. & Tuite, M. F. Regulated translational bypass of stop codons in yeast. *Trends*  
484 *Microbiol* **15**, 78-86, doi:10.1016/j.tim.2006.12.002 (2007).
- 485 4 Firth, A. E. & Brierley, I. Non-canonical translation in RNA viruses. *J Gen Virol* **93**, 1385-1409,  
486 doi:10.1099/vir.0.042499-0 (2012).
- 487 5 Halfmann, R. *et al.* Prions are a common mechanism for phenotypic inheritance in wild  
488 yeasts. *Nature* **482**, 363-368, doi:10.1038/nature10875  
489 nature10875 [pii] (2012).
- 490 6 True, H. L. & Lindquist, S. L. A yeast prion provides a mechanism for genetic variation and  
491 phenotypic diversity. *Nature* **407**, 477-483 (2000).
- 492 7 Steneberg, P. & Samakovlis, C. A novel stop codon readthrough mechanism produces  
493 functional Headcase protein in *Drosophila* trachea. *EMBO Rep* **2**, 593-597, doi:10.1093/embo-  
494 reports/kve128 (2001).
- 495 8 Eswarappa, S. M. *et al.* Programmed translational readthrough generates antiangiogenic  
496 VEGF-Ax. *Cell* **157**, 1605-1618, doi:10.1016/j.cell.2014.04.033 (2014).
- 497 9 Loughran, G. *et al.* Evidence of efficient stop codon readthrough in four mammalian genes.  
498 *Nucleic Acids Res* **42**, 8928-8938, doi:10.1093/nar/gku608 (2014).
- 499 10 Sapkota, D. *et al.* Cell-Type-Specific Profiling of Alternative Translation Identifies Regulated  
500 Protein Isoform Variation in the Mouse Brain. *Cell reports* **26**, 594-607 e597,  
501 doi:10.1016/j.celrep.2018.12.077 (2019).
- 502 11 Jungreis, I. *et al.* Evidence of abundant stop codon readthrough in *Drosophila* and other  
503 metazoa. *Genome Res* **21**, 2096-2113, doi:10.1101/gr.119974.110  
504 gr.119974.110 [pii] (2011).
- 505 12 Dunn, J. G., Foo, C. K., Belletier, N. G., Gavis, E. R. & Weissman, J. S. Ribosome profiling  
506 reveals pervasive and regulated stop codon readthrough in *Drosophila melanogaster*. *Elife* **2**,  
507 e01179, doi:10.7554/eLife.01179  
508 2/0/e01179 [pii] (2013).
- 509 13 Li, C. & Zhang, J. Stop-codon read-through arises largely from molecular errors and is  
510 generally nonadaptive. *PLoS Genet* **15**, e1008141, doi:10.1371/journal.pgen.1008141 (2019).
- 511 14 Arribere, J. A. *et al.* Translation readthrough mitigation. *Nature* **534**, 719-723,  
512 doi:10.1038/nature18308 (2016).
- 513 15 Su, H. W. *et al.* The essential mycobacterial amidotransferase GatCAB is a modulator of  
514 specific translational fidelity. *Nat Microbiol* **1**, 16147, doi:10.1038/nmicrobiol.2016.147  
515 (2016).
- 516 16 Ribas de Pouplana, L., Santos, M. A., Zhu, J. H., Farabaugh, P. J. & Javid, B. Protein  
517 mistranslation: friend or foe? *Trends in biochemical sciences* **39**, 355-362,  
518 doi:10.1016/j.tibs.2014.06.002 (2014).
- 519 17 Hall, M. P. *et al.* Engineered luciferase reporter from a deep sea shrimp utilizing a novel  
520 imidazopyrazinone substrate. *ACS chemical biology* **7**, 1848-1857, doi:10.1021/cb3002478  
521 (2012).

- 522 18 Javid, B. *et al.* Mycobacterial mistranslation is necessary and sufficient for rifampicin  
523 phenotypic resistance. *Proc Natl Acad Sci U S A* **111**, 1132-1137,  
524 doi:10.1073/pnas.1317580111 (2014).
- 525 19 Kramer, E. B. & Farabaugh, P. J. The frequency of translational misreading errors in *E. coli* is  
526 largely determined by tRNA competition. *RNA* **13**, 87-96, doi:rna.294907 [pii]  
527 10.1261/rna.294907 (2007).
- 528 20 Ni, J. Q. *et al.* Vector and parameters for targeted transgenic RNA interference in *Drosophila*  
529 *melanogaster*. *Nat Methods* **5**, 49-51, doi:10.1038/nmeth1146 (2008).
- 530 21 Gupta, P. & Li, Y. R. Upf proteins: highly conserved factors involved in nonsense mRNA  
531 mediated decay. *Mol Biol Rep* **45**, 39-55, doi:10.1007/s11033-017-4139-7 (2018).
- 532 22 He, F. & Jacobson, A. Nonsense-Mediated mRNA Decay: Degradation of Defective Transcripts  
533 Is Only Part of the Story. *Annual review of genetics* **49**, 339-366, doi:10.1146/annurev-genet-  
534 112414-054639 (2015).
- 535 23 Hurt, J. A., Robertson, A. D. & Burge, C. B. Global analyses of UPF1 binding and function reveal  
536 expanded scope of nonsense-mediated mRNA decay. *Genome Res* **23**, 1636-1650,  
537 doi:10.1101/gr.157354.113 (2013).
- 538 24 Tani, H. *et al.* Identification of hundreds of novel UPF1 target transcripts by direct  
539 determination of whole transcriptome stability. *RNA Biol* **9**, 1370-1379,  
540 doi:10.4161/rna.22360 (2012).
- 541 25 Guan, Q. *et al.* Impact of nonsense-mediated mRNA decay on the global expression profile of  
542 budding yeast. *PLoS Genet* **2**, e203, doi:10.1371/journal.pgen.0020203 (2006).
- 543 26 Avery, P. *et al.* *Drosophila* Upf1 and Upf2 loss of function inhibits cell growth and causes  
544 animal death in a Upf3-independent manner. *RNA* **17**, 624-638, doi:10.1261/rna.2404211  
545 (2011).
- 546 27 King-Jones, K., Charles, J. P., Lam, G. & Thummel, C. S. The ecdysone-induced DHR4 orphan  
547 nuclear receptor coordinates growth and maturation in *Drosophila*. *Cell* **121**, 773-784,  
548 doi:10.1016/j.cell.2005.03.030 (2005).
- 549 28 Colak, D., Ji, S. J., Porse, B. T. & Jaffrey, S. R. Regulation of axon guidance by  
550 compartmentalized nonsense-mediated mRNA decay. *Cell* **153**, 1252-1265,  
551 doi:10.1016/j.cell.2013.04.056 (2013).
- 552 29 Inoue, K. *et al.* Molecular mechanism for distinct neurological phenotypes conveyed by allelic  
553 truncating mutations. *Nat Genet* **36**, 361-369, doi:10.1038/ng1322 (2004).
- 554 30 Meyerovich, M., Mamou, G. & Ben-Yehuda, S. Visualizing high error levels during gene  
555 expression in living bacterial cells. *Proc Natl Acad Sci U S A* **107**, 11543-11548,  
556 doi:0912989107 [pii]  
557 10.1073/pnas.0912989107 (2010).
- 558 31 Miranda, I. *et al.* *Candida albicans* CUG mistranslation is a mechanism to create cell surface  
559 variation. *MBio* **4**, doi:10.1128/mBio.00285-13  
560 e00285-13 [pii]  
561 mBio.00285-13 [pii] (2013).
- 562 32 Ruan, B. *et al.* Quality control despite mistranslation caused by an ambiguous genetic code.  
563 *Proc Natl Acad Sci U S A* **105**, 16502-16507, doi:0809179105 [pii]  
564 10.1073/pnas.0809179105 (2008).
- 565 33 Schwartz, M. H. & Pan, T. Temperature dependent mistranslation in a hyperthermophile  
566 adapts proteins to lower temperatures. *Nucleic Acids Res* **44**, 294-303,  
567 doi:10.1093/nar/gkv1379 (2016).



- 568 34 Netzer, N. *et al.* Innate immune and chemically triggered oxidative stress modifies  
569 translational fidelity. *Nature* **462**, 522-526, doi:nature08576 [pii]  
570 10.1038/nature08576 (2009).
- 571 35 Orgel, L. E. The maintenance of the accuracy of protein synthesis and its relevance to ageing.  
572 *Proceedings of the National Academy of Sciences* **49**, 517-521 (1963).
- 573 36 Orgel, L. E. The maintenance of the accuracy of protein synthesis and its relevance to ageing:  
574 a correction. *Proceedings of the National Academy of Sciences* **67**, 1476-1476 (1970).
- 575 37 Orgel, L. E. Ageing of clones of mammalian cells. *Nature* **243**, 441 (1973).
- 576 38 Filion, A. M. & Laughrea, M. Translation fidelity in the aging mammal: studies with an  
577 accurate in vitro system on aged rats. *Mechanisms of ageing and development* **29**, 125-142  
578 (1985).
- 579 39 Ke, Z. *et al.* Translation fidelity coevolves with longevity. *Ageing cell* **16**, 988-993 (2017).
- 580 40 Shi, Z. & Barna, M. Translating the genome in time and space: specialized ribosomes, RNA  
581 regulons, and RNA-binding proteins. *Annu Rev Cell Dev Biol* **31**, 31-54, doi:10.1146/annurev-  
582 cellbio-100814-125346 (2015).
- 583 41 Chen, X. & Dickman, D. Development of a tissue-specific ribosome profiling approach in  
584 *Drosophila* enables genome-wide evaluation of translational adaptations. *PLoS Genet* **13**,  
585 e1007117, doi:10.1371/journal.pgen.1007117 (2017).
- 586 42 Kondrashov, N. *et al.* Ribosome-Mediated Specificity in Hox mRNA Translation and Vertebrate  
587 Tissue Patterning. *Cell* **145**, 383-397, doi:10.1016/j.cell.2011.03.028 (2011).
- 588 43 Ishimura, R. *et al.* RNA function. Ribosome stalling induced by mutation of a CNS-specific  
589 tRNA causes neurodegeneration. *Science* **345**, 455-459, doi:10.1126/science.1249749 (2014).
- 590 44 Nicholson, P. & Muhlemann, O. Cutting the nonsense: the degradation of PTC-containing  
591 mRNAs. *Biochem Soc Trans* **38**, 1615-1620, doi:10.1042/BST0381615 (2010).
- 592 45 Gatfield, D., Unterholzner, L., Ciccarelli, F. D., Bork, P. & Izaurralde, E. Nonsense-mediated  
593 mRNA decay in *Drosophila*: at the intersection of the yeast and mammalian pathways. *EMBO*  
594 *J* **22**, 3960-3970, doi:10.1093/emboj/cdg371 (2003).
- 595 46 Amrani, N. *et al.* A faux 3'-UTR promotes aberrant termination and triggers nonsense-  
596 mediated mRNA decay. *Nature* **432**, 112-118, doi:10.1038/nature03060 (2004).
- 597 47 Hogg, J. R. & Goff, S. P. Upf1 senses 3'UTR length to potentiate mRNA decay. *Cell* **143**, 379-  
598 389, doi:10.1016/j.cell.2010.10.005 (2010).
- 599 48 Kurosaki, T. & Maquat, L. E. Rules that govern UPF1 binding to mRNA 3' UTRs. *Proc Natl Acad*  
600 *Sci U S A* **110**, 3357-3362, doi:10.1073/pnas.1219908110 (2013).
- 601 49 Kebaara, B. W. & Atkin, A. L. Long 3'-UTRs target wild-type mRNAs for nonsense-mediated  
602 mRNA decay in *Saccharomyces cerevisiae*. *Nucleic Acids Res* **37**, 2771-2778,  
603 doi:10.1093/nar/gkp146 (2009).
- 604 50 Mort, M., Ivanov, D., Cooper, D. N. & Chuzhanova, N. A. A meta-analysis of nonsense  
605 mutations causing human genetic disease. *Hum Mutat* **29**, 1037-1047,  
606 doi:10.1002/humu.20763 (2008).
- 607 51 McGlincy, N. J. & Smith, C. W. Alternative splicing resulting in nonsense-mediated mRNA  
608 decay: what is the meaning of nonsense? *Trends in biochemical sciences* **33**, 385-393,  
609 doi:10.1016/j.tibs.2008.06.001 (2008).
- 610 52 MacArthur, D. G. *et al.* A systematic survey of loss-of-function variants in human protein-  
611 coding genes. *Science* **335**, 823-828, doi:10.1126/science.1215040 (2012).
- 612 53 Isken, O. & Maquat, L. E. Quality control of eukaryotic mRNA: safeguarding cells from  
613 abnormal mRNA function. *Genes Dev* **21**, 1833-1856, doi:10.1101/gad.1566807 (2007).
- 614 54 Jagannathan, S. & Bradley, R. K. Translational plasticity facilitates the accumulation of  
615 nonsense genetic variants in the human population. *Genome Res* **26**, 1639-1650,  
616 doi:10.1101/gr.205070.116 (2016).

- 617 55 Feng, Q., Jagannathan, S. & Bradley, R. K. The RNA Surveillance Factor UPF1 Represses  
618 Myogenesis via Its E3 Ubiquitin Ligase Activity. *Mol Cell* **67**, 239-251 e236,  
619 doi:10.1016/j.molcel.2017.05.034 (2017).
- 620 56 Drummond, D. A. & Wilke, C. O. Mistranslation-induced protein misfolding as a dominant  
621 constraint on coding-sequence evolution. *Cell* **134**, 341-352, doi:10.1016/j.cell.2008.05.042
- 622 S0092-8674(08)00705-8 [pii] (2008).
- 623 57 Drummond, D. A. & Wilke, C. O. The evolutionary consequences of erroneous protein  
624 synthesis. *Nat Rev Genet* **10**, 715-724, doi:nrg2662 [pii]
- 625 10.1038/nrg2662 (2009).
- 626 58 Bruno, I. G. *et al.* Identification of a microRNA that activates gene expression by repressing  
627 nonsense-mediated RNA decay. *Mol Cell* **42**, 500-510, doi:10.1016/j.molcel.2011.04.018  
628 (2011).
- 629 59 Lou, C. H. *et al.* Posttranscriptional control of the stem cell and neurogenic programs by the  
630 nonsense-mediated RNA decay pathway. *Cell reports* **6**, 748-764,  
631 doi:10.1016/j.celrep.2014.01.028 (2014).
- 632 60 Duan, Y., Dou, S., Luo, S., Zhang, H. & Lu, J. Adaptation of A-to-I RNA editing in *Drosophila*.  
633 *PLoS Genet* **13**, e1006648, doi:10.1371/journal.pgen.1006648 (2017).
- 634 61 Jaffrey, S. R. & Wilkinson, M. F. Nonsense-mediated RNA decay in the brain: emerging  
635 modulator of neural development and disease. *Nat Rev Neurosci* **19**, 715-728,  
636 doi:10.1038/s41583-018-0079-z (2018).
- 637 62 Roote, J. & Prokop, A. How to design a genetic mating scheme: a basic training package for  
638 *Drosophila* genetics. *G3 (Bethesda)* **3**, 353-358, doi:10.1534/g3.112.004820 (2013).
- 639 63 Brand, A. H. & Perrimon, N. Targeted gene expression as a means of altering cell fates and  
640 generating dominant phenotypes. *development* **118**, 401-415 (1993).
- 641 64 Pfeiffer, B. D., Truman, J. W. & Rubin, G. M. Using translational enhancers to increase  
642 transgene expression in *Drosophila*. *Proc Natl Acad Sci U S A* **109**, 6626-6631,  
643 doi:10.1073/pnas.1204520109 (2012).
- 644 65 Cavener, D. R. Comparison of the consensus sequence flanking translational start sites in  
645 *Drosophila* and vertebrates. *Nucleic acids research* **15**, 1353-1361 (1987).
- 646 66 Markstein, M., Pitsouli, C., Villalta, C., Celniker, S. E. & Perrimon, N. Exploiting position effects  
647 and the gypsy retrovirus insulator to engineer precisely expressed transgenes. *Nat Genet* **40**,  
648 476-483, doi:10.1038/ng.101 (2008).
- 649 67 Linford, N. J., Bilgir, C., Ro, J. & Pletcher, S. D. Measurement of lifespan in *Drosophila*  
650 *melanogaster*. *J Vis Exp*, doi:10.3791/50068 (2013).
- 651 68 Zang, Y. *et al.* Plasma membrane overgrowth causes fibrotic collagen accumulation and  
652 immune activation in *Drosophila* adipocytes. *Elife* **4**, e07187, doi:10.7554/eLife.07187 (2015).
- 653 69 Ponton, F., Chapuis, M. P., Pernice, M., Sword, G. A. & Simpson, S. J. Evaluation of potential  
654 reference genes for reverse transcription-qPCR studies of physiological responses in  
655 *Drosophila melanogaster*. *J Insect Physiol* **57**, 840-850, doi:10.1016/j.jinsphys.2011.03.014  
656 (2011).

657

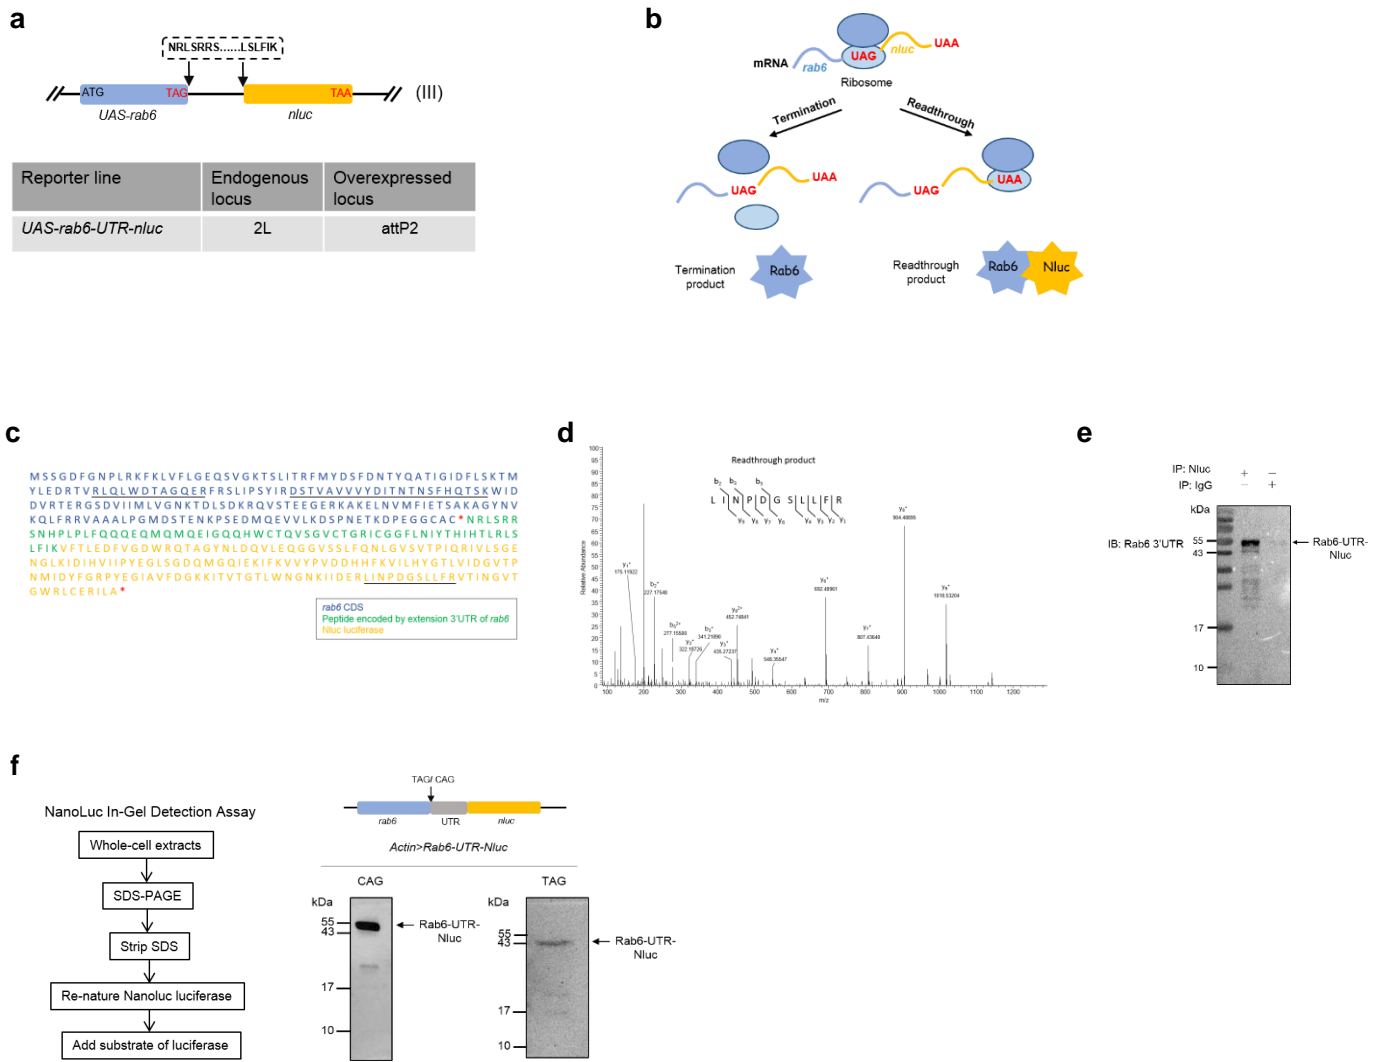

**Fig. 1: An *in vivo* gain-of-function reporter fly line can sensitively detect translational readthrough.**

**a**, Schematic for construction of the in-frame stop codon readthrough reporter. The gene coding for *nluc*, missing its start codon, was cloned immediately upstream of the second in-frame stop codon following *rab6*, its native stop codon and 3' UTR. **b**, Schematic for basis of the stop codon readthrough reporter. The expression of UAS-Rab6-UTR-Nluc was driven by Actin-Gal4. Normal termination of translation at the first in-frame stop codon would result in no expression of Nluc. Translational readthrough would result in expression of Rab6-UTR-Nluc, and detection of luciferase activity. **c**, Primary sequence of the C-terminal extended polypeptide that would result from translational readthrough of the reporter. Red stars represent the stop codons. Underlined sequences represent peptides detected by mass spectrometry. **d**, MS/MS spectrum representing a peptide, LINPDGSLFR, from Nluc. The spectrum contains a total of eight C-terminal "y" ions and three N-terminal "b" ions consistent with this sequence. **e**, Western blot with antibody raised against a 3'UTR peptide of Rab6 following IP of Nluc from the reporter fly line. **f**, Nanoluc luciferase in-gel detection identifies Nluc with migration consistent with translational readthrough. Whole-cell extracts of *Actin>Rab6-TAG-Nluc* adult flies and the variant with TAG-to-CAG substitution were assayed.

**a**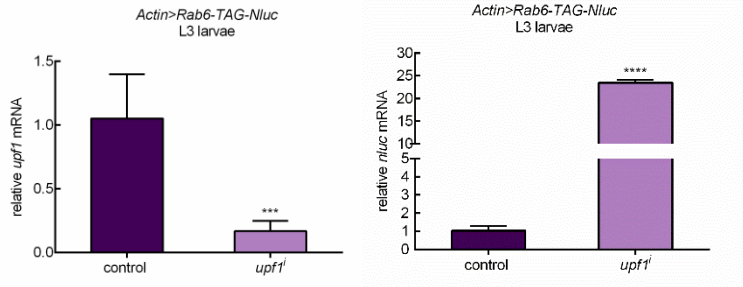**b**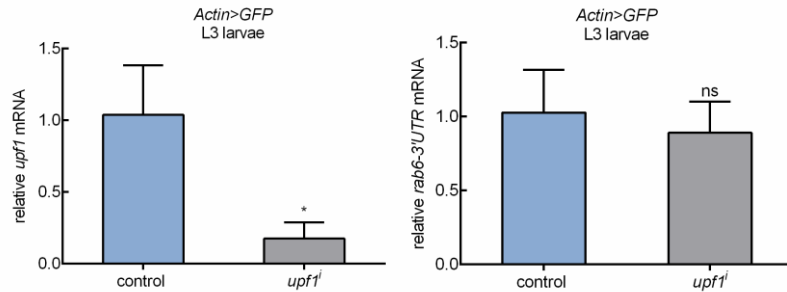**c**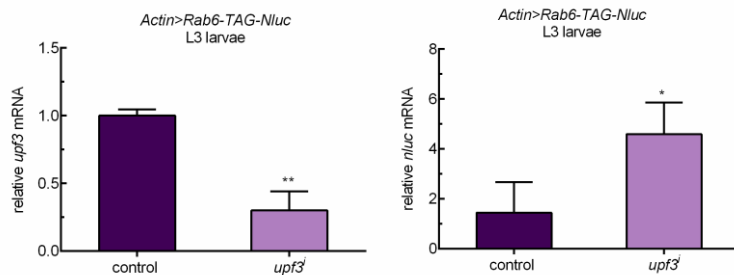**d**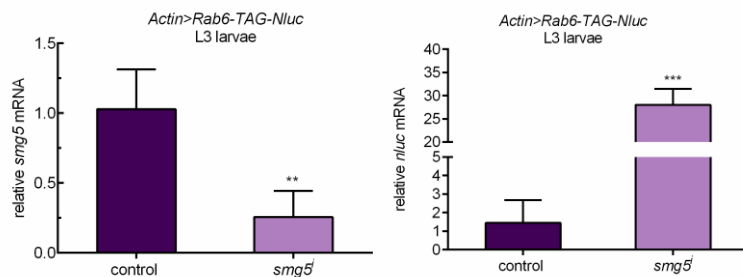**Fig. 2: The stop codon of reporter flies is recognized as a premature termination codon.**

**a**, Knockdown of Upf1 is associated with increased abundance of *rab6*-based reporter transcript. *Actin>Rab6-TAG-3'UTR-Nluc* fly expressed both readthrough reporter and GFP. *upf1* (THFC\_TH02846.N) was knocked down efficiently by Actin promoter (left panel). *rab6* reporter mRNA abundance was measured by quantitative RT-PCR with *nluc* primer. *rp49* abundance was used for normalization. **b**, Knockdown of Upf1 doesn't affect abundance of endogenous *rab6*. *upf1* was knocked down efficiently by Actin promoter (left panel). Native *rab6* mRNA abundance was measured by quantitative RT-PCR with *rab6-3'UTR* primer. *rp49* abundance was used for normalization. **c**, **d**) Knockdown of NMD associated factors increases *rab6*-based reporter transcript. *upf3* (BDSC\_58181) and *smg5* (BDSC\_62261) were knocked down efficiently by Actin promoter. *rp49* abundance was used for normalization. Data represent means of three independent experiments  $\pm$  s.d. in a-d. \* $P < 0.05$ , \*\* $P < 0.01$ , \*\*\* $P < 0.001$ , \*\*\*\* $P < 0.0001$ ; ns,  $P > 0.05$  by Student's t-test.

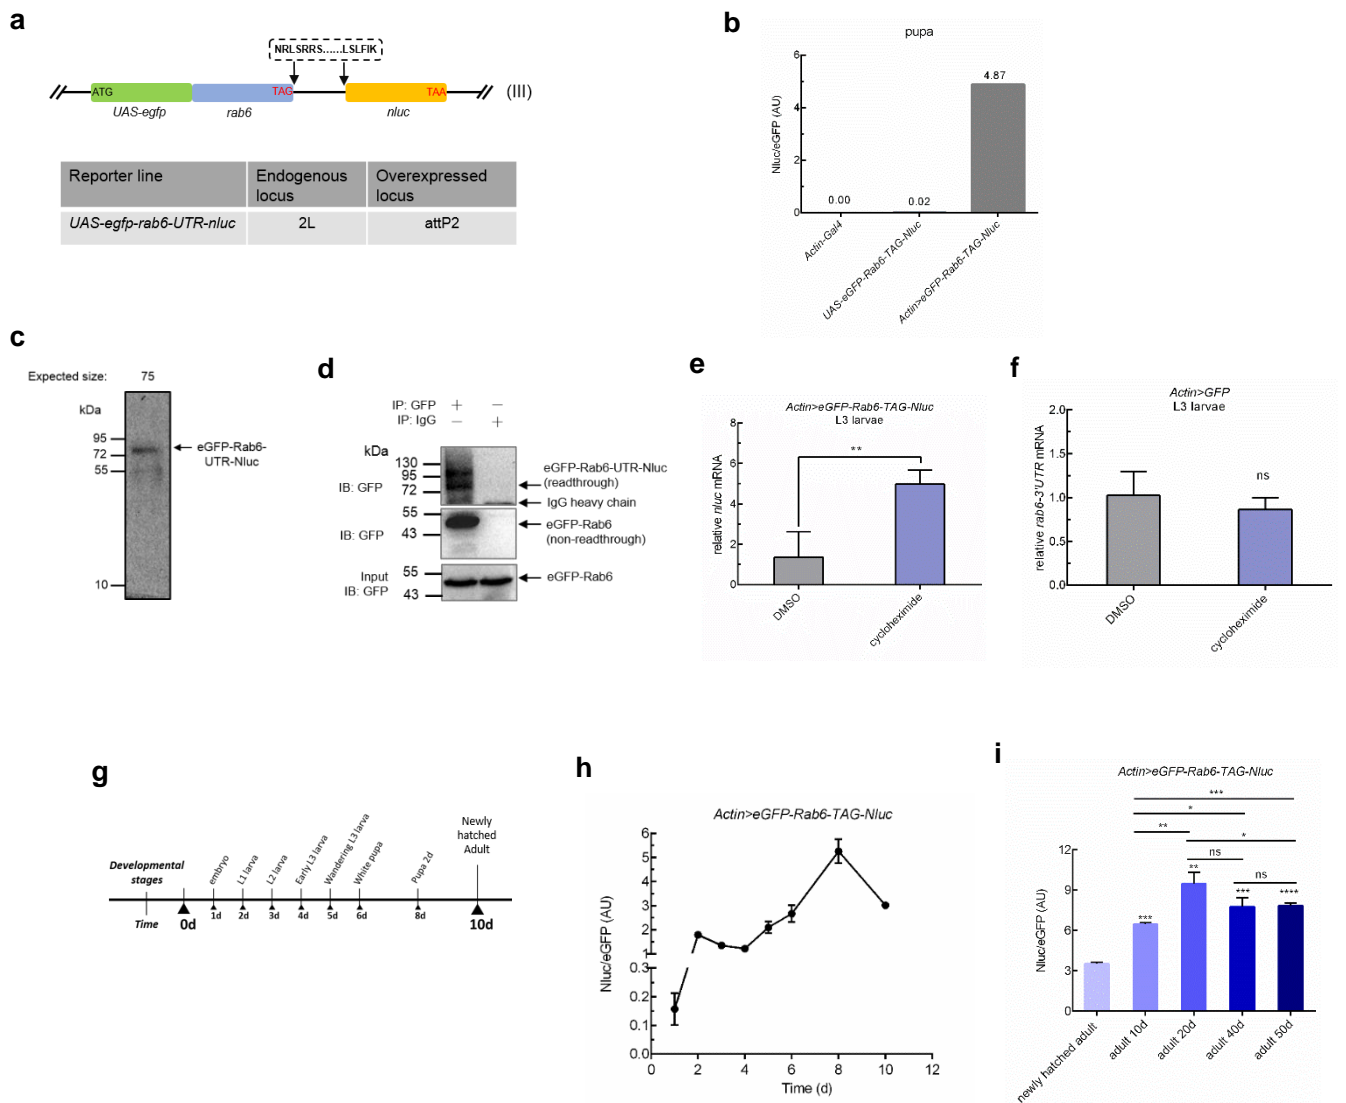

**Fig. 3: PTC readthrough varies in a developmental stage-dependent manner.**

**a**, Schematic for construction of the in-frame stop codon readthrough reporter. The gene coding for *nluc*, missing its start codon, was cloned immediately upstream of the second in-frame stop codon following *rab6*, its native stop codon and 3'UTR. Here, the peptide sequence NRLSRRS.....LSLFIK were encoded by extension 3'UTR of *rab6*. To construct the transgene *egfp\_rab6\_UTR\_nluc*, *egfp*, missing its stop codon, was fused immediately 5' to *rab6* with its start codon removed. **b**, The readthrough reporter sensitively detects translational readthrough with minimal background signal. Nluc activity was only detected when the fly line expressed both the reporter and actin-driven Gal4. **c**, Readthrough product from *Actin>eGFP-Rab6-TAG-Nluc* whole-cell extracts was detected by Nanoluciferase in-gel detection assay. **d**, Readthrough efficiency was assayed by western blot. Lysates from *Actin>eGFP-Rab6-TAG-Nluc* adult flies were immunoprecipitated with mouse anti-GFP antibody or normal mouse IgG. eGFP-Rab6 (non-readthrough) and eGFP-Rab6-UTR-Nluc (readthrough) were separated by immunoblot analysis with rat anti-GFP antibody. PVDF membrane was cut at 55 kDa, eGFP-Rab6 was exposure with 10s and eGFP-Rab6-UTR-Nluc with 3600s, respectively. **e**, **f**, The reporter transcript of *rab6* is subjected to NMD. **E**, Suppression of NMD by cycloheximide increased readthrough reporter mRNA abundance. *Actin>eGFP-Rab6-TAG-Nluc* L3 larvae were transferred to standard fly food containing 500  $\mu$ g/ml cycloheximide or DMSO for 24h. Reporter transcript abundance was assessed by real-time RT-PCR. **F**, Suppression of NMD does not affect endogenous *rab6*. Endogenous *rab6* mRNA abundance was measured by quantitative RT-PCR with *rab6-3'UTR* primer. *rp49* abundance was used for normalization. **g**, Cartoon representing time-points throughout the fly life-cycle when measurements were taken in **(h)**. **i**, Higher readthrough level in old flies is not aging associated. Adult flies at day 10, 20, 40 and 50 of adult life were collected separately for analysis. Relative readthrough rates in *Actin>eGFP-Rab6-TAG-Nluc* adult flies were measured by normalized Nluc activity (Nluc/eGFP).

Data represent means of three independent experiments  $\pm$  s.d. \* $P < 0.05$ , \*\* $P < 0.01$ , \*\*\* $P < 0.001$ ; \*\*\*\* $P < 0.0001$ ; ns,  $P > 0.05$  by Student's t-test.

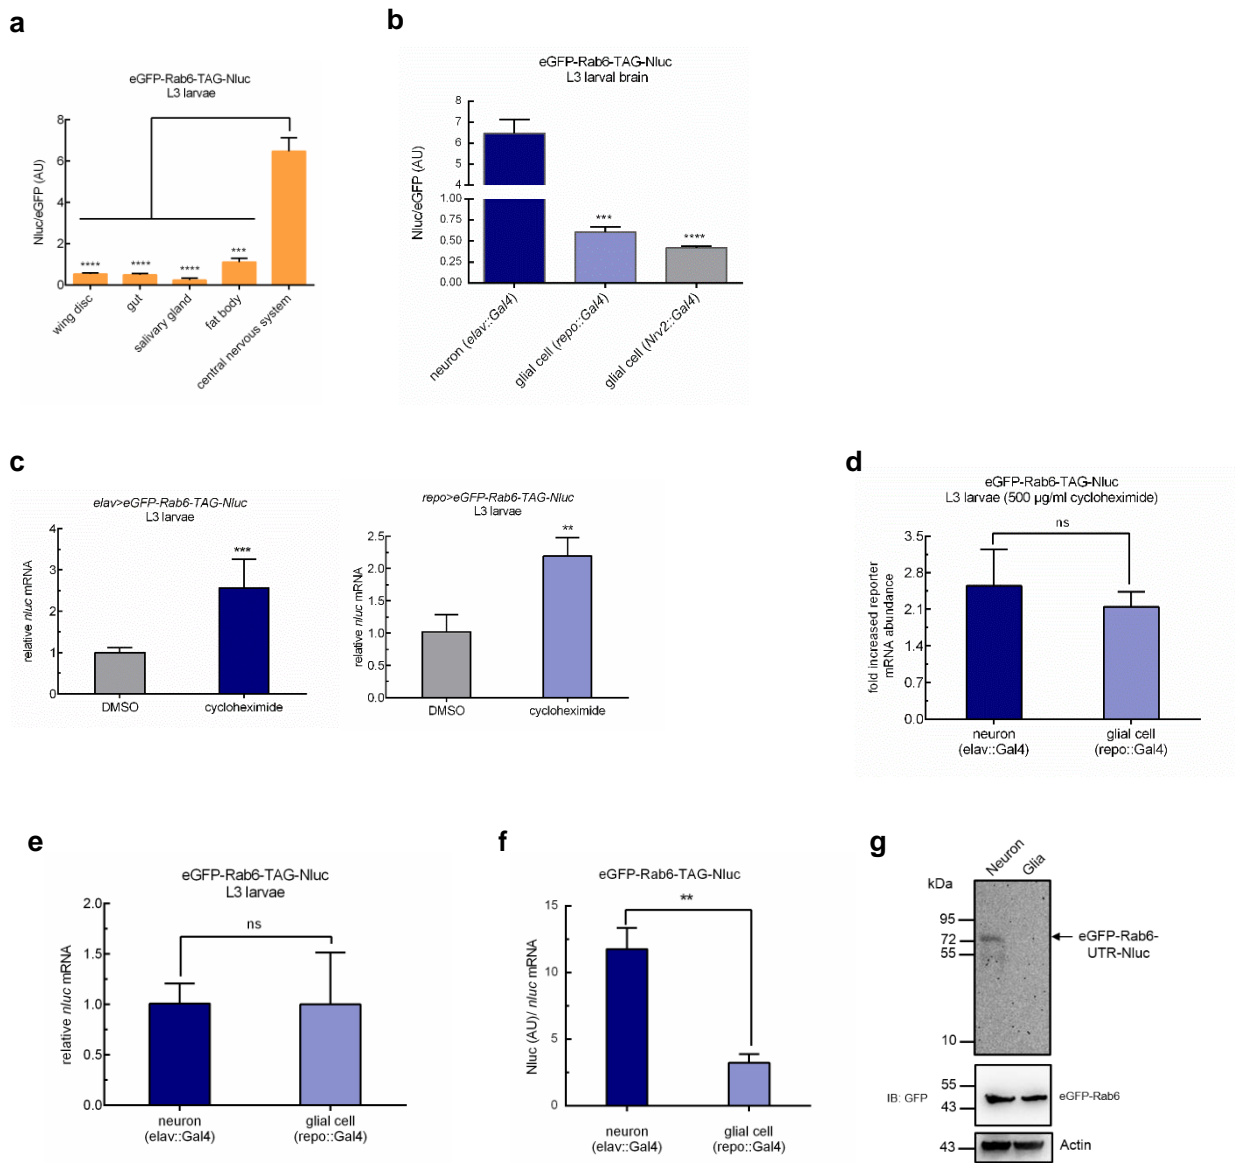

**Fig. 4: Neurons undergo higher rates of PTC readthrough.**

**a**, Rates of readthrough vary by tissue in wandering L3 larvae. Expression in wing disc was driven by *rn-Gal4*, gut by *crq-Gal4*, salivary gland by *He-Gal4*, fat body by *Cg-Gal4*, brain by *elav-Gal4*. Larval tissues were dissected to measure relative readthrough level. **b**, Neurons undergo higher rates of stop codon readthrough. Higher rates of translational readthrough in larval neurons compared with glial cells. Neuronal expression was driven by *elav-Gal4* and glial expression by *repo-Gal4* and *Nrv2-Gal4*, respectively. Larval brains were dissected and readthrough rates measured in cell-lysates. **c**, Reporter transcripts in larval neurons and glial cells are subject to NMD. L3 larvae were transferred to standard fly food containing 500 µg/ml cycloheximide or DMSO for 24h. Reporter transcript abundance was assessed by real-time RT-PCR. *rp49* abundance was used for normalization. **d**, The measured variation in Nluc/eGFP was not due to variation of NMD activity. Relative increase in transcript abundance in neurons and glia following suppression of NMD as measured by quantitative RT-PCR. *rp49* abundance was used for normalization. **e**, Reporter transcript abundance in neurons and glia. Reporter transcript abundance was assessed by real-time RT-PCR. *rp49* abundance was used for normalization. **f**, Neurons undergo higher rates of PTC readthrough. Relative readthrough level in neurons and glial cells in *eGFP-Rab6-TAG-Nluc* larvae. Nluc activity was normalized to the abundance of *nLuc* mRNA, and *nLuc* mRNA expression was determined by qRT-PCR. Data represent means of three independent experiments  $\pm$  s.d. **g**, The measured variation in Nluc/eGFP are due to variation of readthrough rates. Neuronal expression was driven by *elav-Gal4* and glial expression by *repo-Gal4*. Readthrough products from *Neural cell>eGFP-Rab6-TAG-Nluc* whole-cell extracts were detected by Nanoluc luciferase in-gel detection assay. Loading control by Western blot.

Data represent means of three independent experiments  $\pm$  s.d. **\*\*** $P < 0.01$ , **\*\*\*** $P < 0.001$ , **\*\*\*\*** $P < 0.0001$ ; ns,  $P > 0.05$  by Student's t-test.
